# Supplementary material for: Ultrasound-assisted switchable hydrophilic solvent-based homogeneous liquid–liquid microextraction for the determination of triazole fungicides in environmental water by GC-MS
Source: Royal Society of Chemistry journal article supplement (doi:10.1039/d1ay02109e), 2022-01-01
Supplement: d1ay02109e1.pdf [file d1ay02109e1.pdf]

Supporting information for

**Ultrasound assisted switchable hydrophilic solvent based homogeneous liquid-liquid microextraction for determination of triazole fungicides in environmental water by GC-MS**

Huihao Lv<sup>a</sup>, Xiangzi Jin<sup>a</sup>, Zhihui Zhang<sup>a</sup>, Yao Chen<sup>a</sup>, Guohua Zhu<sup>b, \*</sup>, Zuguang Li<sup>a, \*</sup>, Mawrong Lee<sup>c</sup>

<sup>a</sup> College of Chemical Engineering, Zhejiang University of Technology, Hangzhou 310014, China

<sup>b</sup> Zhejiang Key Laboratory of Ecological and Environmental Monitoring, Forewarning and Quality Control, Zhejiang Ecological and Environmental Monitoring Center, Hangzhou 310012, China

<sup>c</sup> Department of Chemistry, National Chung Hsing University, Taichung 40227, Taiwan

\* Corresponding author : College of Chemical Engineering, Zhejiang University of Technology, Hangzhou 310014, China E-mail address: lzg@zjut.edu.cn; wally5258@163.com

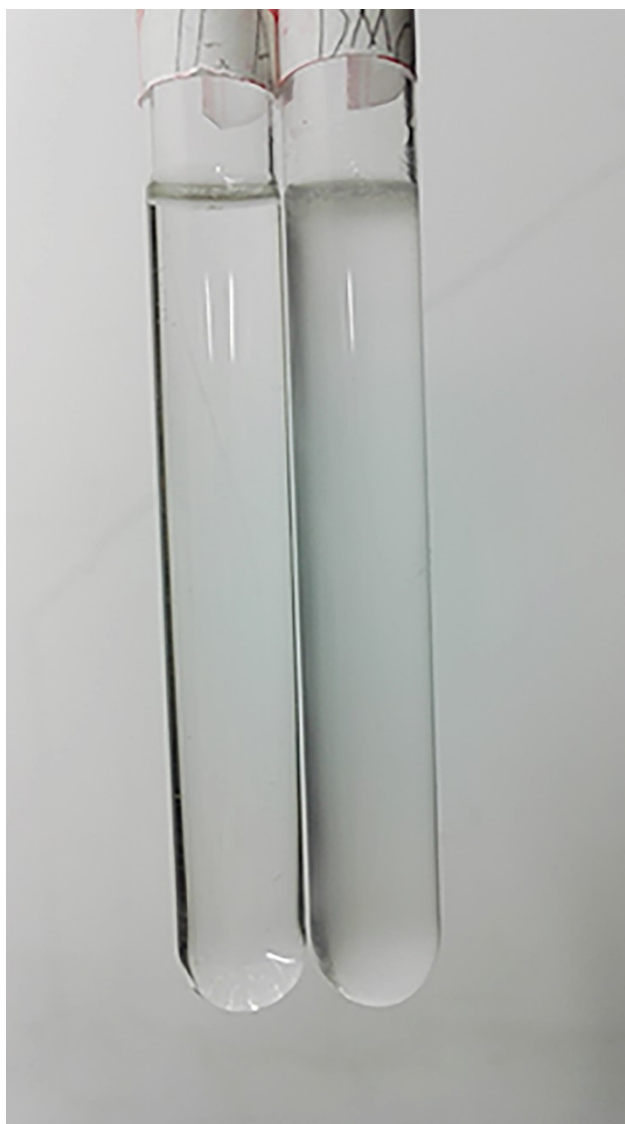

Fig. S1 Effect of SHS type on the extraction of 3 TFs. TEA on the left and DMCHA on the right. Extraction conditions: extraction solvent volume, 400  $\mu$ L; ultrasonic time, 30 s; NaOH volume, 2 mL; NaCl, 0 g.

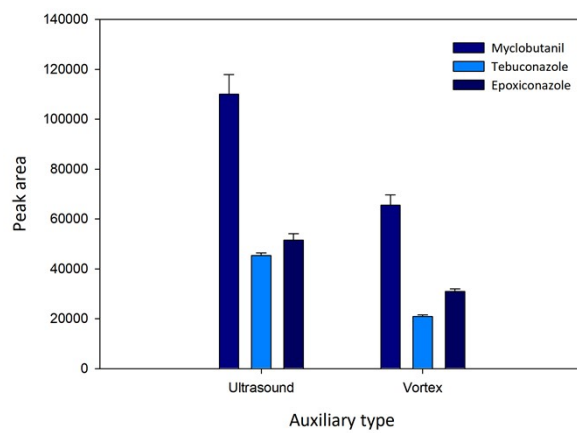

Fig. S2 Effect of auxiliary type on the extraction of 3 TFs. Extraction conditions: extraction solvent (Protonated DMCHA) volume, 400  $\mu$ L; auxiliary time, 30 s; NaOH volume, 2 mL; NaCl, 0 g.

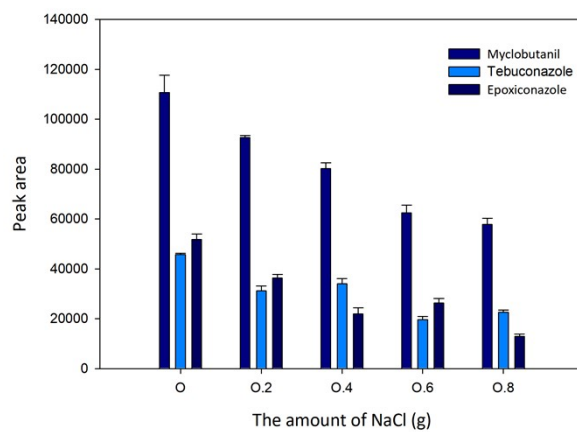

Fig. S3 Effect of Ionic Strength on the extraction of 3 TFs. Extraction conditions: extraction solvent (Protonated DMCHA) volume, 400  $\mu$ L; ultrasonic time, 30 s; NaOH volume, 2 mL.

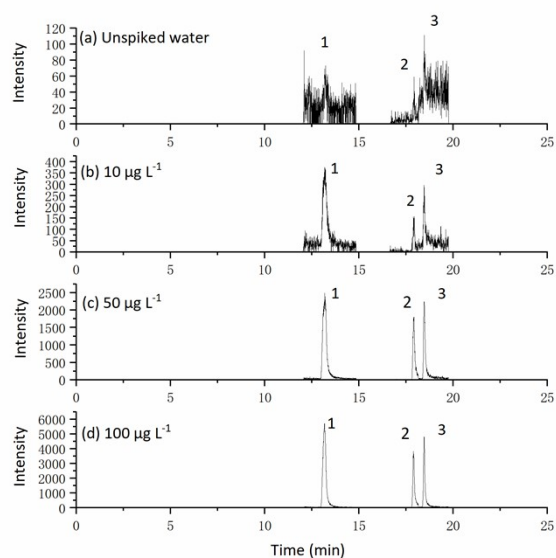

Fig. S4 Total ionic chromatograms of (a) an unspiked water sample; (b) water samples spiked with  $10 \mu\text{g}\cdot\text{L}^{-1}$  of each analyte; (c)  $50 \mu\text{g}\cdot\text{L}^{-1}$  of each analyte; (d)  $100 \mu\text{g}\cdot\text{L}^{-1}$  of each analyte. (1: Myclobutanil, 2: Tebuconazole, 3: Epoxiconazole)

Table S1 The details of the Box–Behnken design

| Name                   | Low (-1) | High (+1) |
|------------------------|----------|-----------|
| A: SHS( $\mu$ L)       | 400      | 500       |
| B: NaOH (mL)           | 1.5      | 2.5       |
| C: Ultrasonic time (s) | 15       | 45        |

  

| No. | A:SHS ( $\mu$ L) | B: NaOH (mL) c | C: ultrasonic time (s) |
|-----|------------------|----------------|------------------------|
| 1   | 450              | 2              | 30                     |
| 2   | 500              | 2              | 15                     |
| 3   | 450              | 2              | 30                     |
| 4   | 450              | 2.5            | 45                     |
| 5   | 400              | 2.5            | 30                     |
| 6   | 450              | 2              | 30                     |
| 7   | 400              | 1.5            | 30                     |
| 8   | 450              | 2              | 30                     |
| 9   | 400              | 2              | 15                     |
| 10  | 500              | 2              | 45                     |
| 11  | 500              | 2.5            | 30                     |
| 12  | 500              | 1.5            | 30                     |
| 13  | 450              | 1.5            | 15                     |
| 14  | 450              | 2              | 30                     |
| 15  | 450              | 1.5            | 45                     |
| 16  | 450              | 2.5            | 15                     |
| 17  | 400              | 2              | 45                     |

Table S2 Calibration curves of three triazoles (n=3)

| Analytes      | Equation        | linear range ( $\text{mg}\cdot\text{L}^{-1}$ ) | R <sup>2</sup> |
|---------------|-----------------|------------------------------------------------|----------------|
| Myclobutanil  | Y=23664x-4091.6 | 1-10                                           | 0.9997         |
| Tebuconazole  | Y=6069.9x-2297  | 1-10                                           | 0.9997         |
| Epoxiconazole | Y=9155x-3318    | 1-10                                           | 0.9992         |

**Table S3** Recoveries of three triazoles added in environmental water(n=3)

| Analytes     | Spiked                                             | Recoveries, % |       |       | RSD, % |
|--------------|----------------------------------------------------|---------------|-------|-------|--------|
|              | concentration<br>/ $\mu\text{g}\cdot\text{L}^{-1}$ |               |       |       |        |
| Myclobutanil | 10                                                 | 97.2          | 103.1 | 97.2  | 3.43   |
|              | 50                                                 | 105.9         | 105.4 | 95.7  | 5.62   |
|              | 100                                                | 90.5          | 105.1 | 90.1  | 9.01   |
| Tebuconazole | 10                                                 | 94.8          | 97.5  | 99.1  | 2.19   |
|              | 50                                                 | 90.1          | 91.7  | 94.5  | 2.42   |
|              | 100                                                | 83.8          | 94.1  | 89.6  | 5.74   |
| Epoiconazole | 10                                                 | 91.4          | 111.1 | 108.7 | 10.36  |
|              | 50                                                 | 86.2          | 107.1 | 81.3  | 14.97  |
|              | 100                                                | 98.5          | 107.2 | 90.4  | 8.51   |
